# Supplementary material
Source: PubMed Central journal article supplement (PMC5289664)
Supplement: ADVS-3-1500359-s001.pdf [file ADVS-3-1500359-s001.pdf]

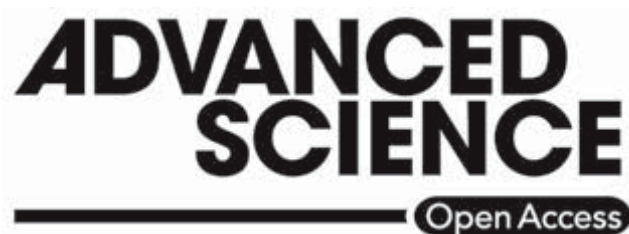

## Supporting Information

for *Adv. Sci.*, DOI: 10.1002/advs.201500359

Antiperovskite  $\text{Li}_3\text{OCl}$  Superionic Conductor Films for Solid-State Li-Ion Batteries

*Xujie Lü,\* John W. Howard, Aiping Chen, Jinlong Zhu, Shuai Li, Gang Wu, Paul Dowden, Hongwu Xu, Yusheng Zhao,\* and Quanxi Jia\**

## Supporting Information

**Anti-Perovskite Li<sub>3</sub>OCl Superionic Conductor Films for Solid-State Li-Ion Batteries**

*Xujie Li,<sup>\*</sup> John W. Howard, Aiping Chen, Jinlong Zhu, Shuai Li, Gang Wu, Paul Dowden, Hongwu Xu, Yusheng Zhao,<sup>\*</sup> and Quanxi Jia<sup>\*</sup>*

**Experimental details***Target preparation and film deposition:*

To prepare the composite target for pulsed laser deposition of Li<sub>3</sub>OCl films, Li<sub>2</sub>O (Aldrich, 97% purity) and LiCl powders (Aldrich, 99% purity) with stoichiometric ratios were mixed and ground thoroughly in an Ar-filled glove box. The mixed powders were pressed into a pellet at a pressure of 3000 psi. The pellet was annealed at 350 °C in a controlled environment (Ar protection) for 4 hours. The XRD pattern in Figure 1a clearly indicates that the annealing process for target preparation does not result in obvious chemical reaction between the raw materials.

The Li<sub>3</sub>OCl films were deposited on Li-coated silicon and polished stainless steel substrates by PLD (KrF laser, 248 nm, 20 Hz) under vacuum ( $1 \times 10^{-5}$  Torr) using the as-prepared composite target. A protective layer of ZnO was deposited on top of the Li<sub>3</sub>OCl films without breaking the vacuum (simply by switching the targets) to prevent Li<sub>3</sub>OCl from direct exposure to air during XRD and SEM measurements. The multi-layer films of Au/Li<sub>3</sub>OCl/Au and Li/Li<sub>3</sub>OCl/Li were deposited without breaking the vacuum to study the ionic conductivity, cyclability, and compatibility with lithium metal of the Li<sub>3</sub>OCl films. The detailed PLD parameters for the deposition of different materials are shown in Table S1.

*Characterizations and electrochemical measurements:*

The structure of the films was studied by X-ray diffraction (XRD, Rigaku Ultima III), and the interfacial characteristic between Li<sub>3</sub>OCl and Li metal was investigated by scanning electron microscopy (SEM) instrument equipped with an in-situ Focused Ion Beam (FIB)

system. Electrochemical measurements were carried out using an air-tight cell. AC electrochemical impedance spectroscopy (EIS) measurements were conducted in the frequency range from 100 Hz to 4 MHz with a voltage amplitude of 10 mV by using an electrochemical system (PARSTAT 2273, Princeton Applied Research). The temperature was controlled from room temperature to 140 °C. The ionic conductivities and the activation energy of the  $\text{Li}_3\text{OCl}$  films were derived from the impedance spectra. The symmetric cell of  $\text{Li}/\text{Li}_3\text{OCl}/\text{Li}$  was cycled by applying a constant current of 1.0 mA with periodically changed polarity using a battery test station (Arbin BT-2000) at room temperature. Full solid-state LIBs with a configuration of graphite/ $\text{Li}_3\text{OCl}/\text{LiCoO}_2$  were constructed via a layer-by-layer deposition route, and the cycling tests were carried out between 2.2 and 4.2 V at an applied current of 10 mA  $\text{g}^{-1}$  at room temperature. The morphologies of graphite anode and  $\text{LiCoO}_2$  cathode used in the full batteries are shown in Figure S3.

**Table S1.** PLD parameters used for deposition of different materials. The KrF laser with wavelength of 248 nm was used.

| Films                                                             | $\text{Li}_3\text{OCl}$ layer                           | ZnO layer                                                    | Au layer                                                     | Li layer                                                       | $\text{LiCoO}_2$ layer                                                 |
|-------------------------------------------------------------------|---------------------------------------------------------|--------------------------------------------------------------|--------------------------------------------------------------|----------------------------------------------------------------|------------------------------------------------------------------------|
| <b><math>\text{Li}_3\text{OCl}/\text{ZnO}</math></b>              | 4.0 J $\text{cm}^{-2}$<br>30 Hz, 60 min, 175 °C, vacuum | 4.0 J $\text{cm}^{-2}$<br>30 Hz, 30 min, 175 °C, 50 mTorr Ar | N/A                                                          | N/A                                                            | N/A                                                                    |
| <b><math>\text{Au}/\text{Li}_3\text{OCl}/\text{Au}</math></b>     | 4.0 J $\text{cm}^{-2}$<br>30 Hz, 60 min, 175 °C, vacuum | N/A                                                          | 6.0 J $\text{cm}^{-2}$<br>20 Hz, 60 min, 175 °C, 50 mTorr Ar | N/A                                                            | N/A                                                                    |
| <b><math>\text{Li}/\text{Li}_3\text{OCl}/\text{Li}</math></b>     | 4.0 J $\text{cm}^{-2}$<br>30 Hz, 60 min, 175 °C, vacuum | N/A                                                          | N/A                                                          | 2.0 J $\text{cm}^{-2}$<br>30 Hz, 60 min, 175 °C<br>50 mTorr Ar | N/A                                                                    |
| <b><math>\text{C}/\text{Li}_3\text{OCl}/\text{LiCoO}_2</math></b> | 4.0 J $\text{cm}^{-2}$<br>30 Hz, 60 min, 175 °C, vacuum | N/A                                                          | N/A                                                          | N/A                                                            | 5.0 J $\text{cm}^{-2}$<br>10 Hz, 30 min, 200 °C, 75 mTorr $\text{O}_2$ |
| <b><math>\text{Li}/\text{Li}_3\text{OCl}/\text{ZnO}</math></b>    | 4.0 J $\text{cm}^{-2}$<br>30 Hz, 60 min, 175 °C, vacuum | 4.0 J $\text{cm}^{-2}$<br>30 Hz, 30 min, 175 °C, 50 mTorr Ar | N/A                                                          | 2.0 J $\text{cm}^{-2}$<br>30 Hz, 60 min, 175 °C<br>50 mTorr Ar | N/A                                                                    |

**Table S2.** Summary of properties and synthetic methods for various solid-state electrolytes.

| Electrolytes                                                                   | $\sigma$ at RT<br>(S cm <sup>-1</sup> ) | $E_a$<br>(eV) | Working<br>window | Stability<br>with Li | Synthesis methods               |
|--------------------------------------------------------------------------------|-----------------------------------------|---------------|-------------------|----------------------|---------------------------------|
| Li <sub>3</sub> OCl<br>in this work                                            | $2 \times 10^{-4}$                      | 0.35          | > 5 V             | Stable               | Pulsed laser deposition         |
| Li <sub>3</sub> OCl<br>in reference <sup>[1]</sup>                             | $9 \times 10^{-6}$                      | 0.36          | > 5 V             | Stable               | Pulsed laser deposition         |
| LiPON <sup>[2-3]</sup>                                                         | $10^{-6}$                               | 0.7           | 1.0–5.0 V         | Stable               | Sputtering                      |
| Single-crystal Li <sub>3</sub> N <sup>[4]</sup>                                | $10^{-3}$                               | 0.25          | N/A               | Stable               | Czochralski technique           |
| Li <sub>14</sub> Zn(GeO <sub>4</sub> ) <sub>4</sub> <sup>[5]</sup>             | $10^{-6}$                               | 0.42          | N/A               | Unstable             | Solid state reaction            |
| Li <sub>7</sub> La <sub>3</sub> Zr <sub>2</sub> O <sub>12</sub> <sup>[6]</sup> | $10^{-4}$                               | 0.36          | >3V               | Stable               | Solid state reaction            |
| $\gamma$ -Li <sub>3</sub> PS <sub>4</sub> <sup>[7]</sup>                       | $10^{-7}$                               | 0.49          | N/A               | Unstable             | Solid state reaction            |
| $\beta$ -Li <sub>3</sub> PS <sub>4</sub> (nano) <sup>[8]</sup>                 | $10^{-4}$                               | 0.35          | > 5 V             | Unstable             | THF-assisted solution<br>method |
| Li <sub>4</sub> SnS <sub>4</sub> <sup>[9]</sup>                                | $10^{-5}$                               | 0.4           | > 5 V             | Unstable             | Solid state reaction            |

**Figures**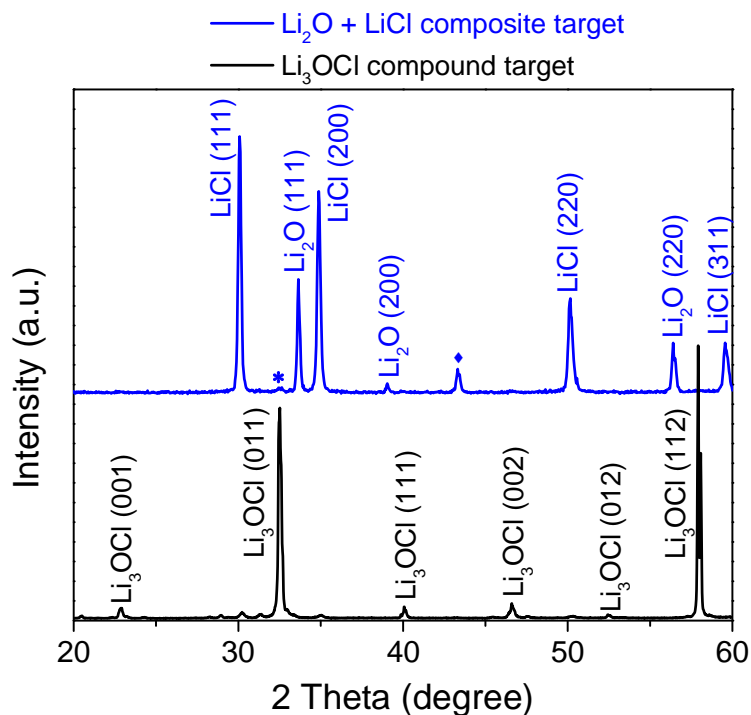**Figure S1.** XRD patterns of Li<sub>2</sub>O + LiCl composite target and fully reacted Li<sub>3</sub>OCl compound target. The symbol of ♦ indicates the peak from Cu holder.

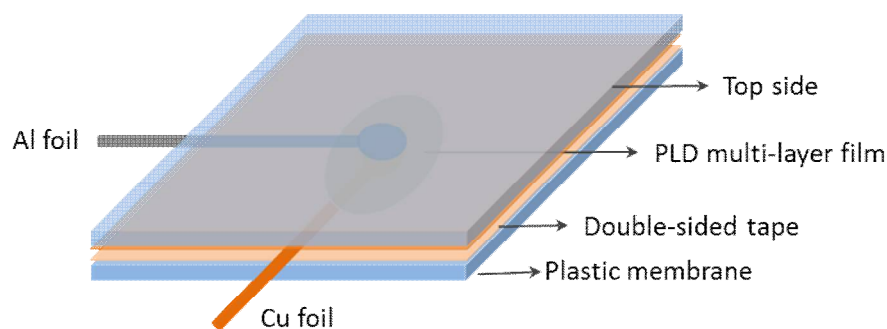

**Figure S2.** Schematic structure of the membrane-type solid-state Li-ion battery.

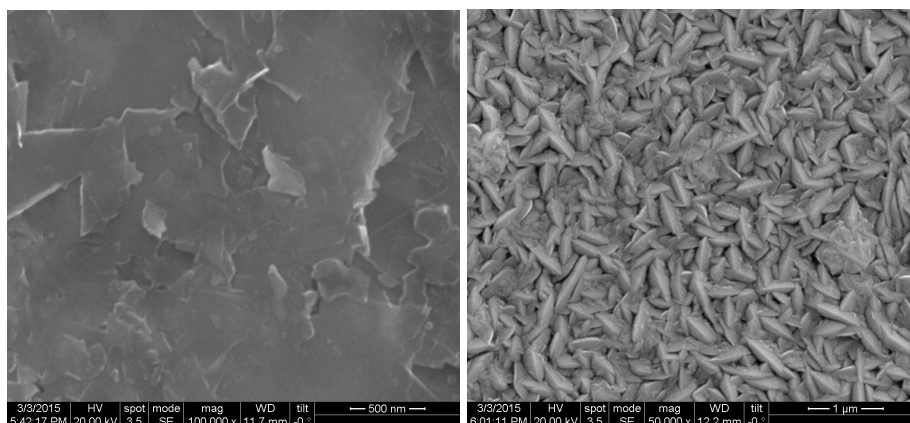

**Figure S3.** SEM images of graphite anode (left) and LiCoO<sub>2</sub> cathode (right) used in the full thin-film LIBs.

## References

- [1] X. Lü, G. Wu, J. W. Howard, A. Chen, Y. Zhao, L. L. Daemen, Q. Jia, *Chem. Commun.* **2014**, *50*, 11520-11522.
- [2] H. Y. Park, S. C. Nam, Y. C. Lim, K. G. Choi, K. C. Lee, G. B. Park, S.-R. Lee, H. P. Kim, S. B. Cho, *J. Electroceram.* **2006**, *17*, 1023-1030.
- [3] F. Muñoz, A. Durán, L. Pascual, L. Montagne, B. Revel, A. C. M. Rodrigues, *Solid State Ionics* **2008**, *179*, 574-579.
- [4] U. v. Alpen, A. Rabenau, G. H. Talat, *Appl. Phys.Lett.* **1977**, *30*, 621-623.
- [5] U. v. Alpen, M. F. Bell, W. Wichelhaus, K. Y. Cheung, G. J. Dudley, *Electrochim. Acta* **1978**, *23*, 1395-1397.

- [6] A. Kaeriyama, H. Munakata, K. Kajihara, K. Kanamura, Y. Sato, T. Yoshida, *ECS Transactions* **2009**, *16*, 175-180.
- [7] M. Tachez, J.-P. Malugani, R. Mercier, G. Robert, *Solid State Ionics* **1984**, *14*, 181-185.
- [8] Z. Liu, W. Fu, E. A. Payzant, X. Yu, Z. Wu, N. J. Dudney, J. Kiggans, K. Hong, A. J. Rondinone, C. Liang, *J. Am. Chem. Soc.* **2013**, *135*, 975-978.
- [9] G. Sahu, Z. Lin, J. Li, Z. Liu, N. Dudney, C. Liang, *Energy Environ. Sci.* **2014**, *7*, 1053-1058.
